# Supplementary material
Source: PubMed Central journal article supplement (PMC8479411)

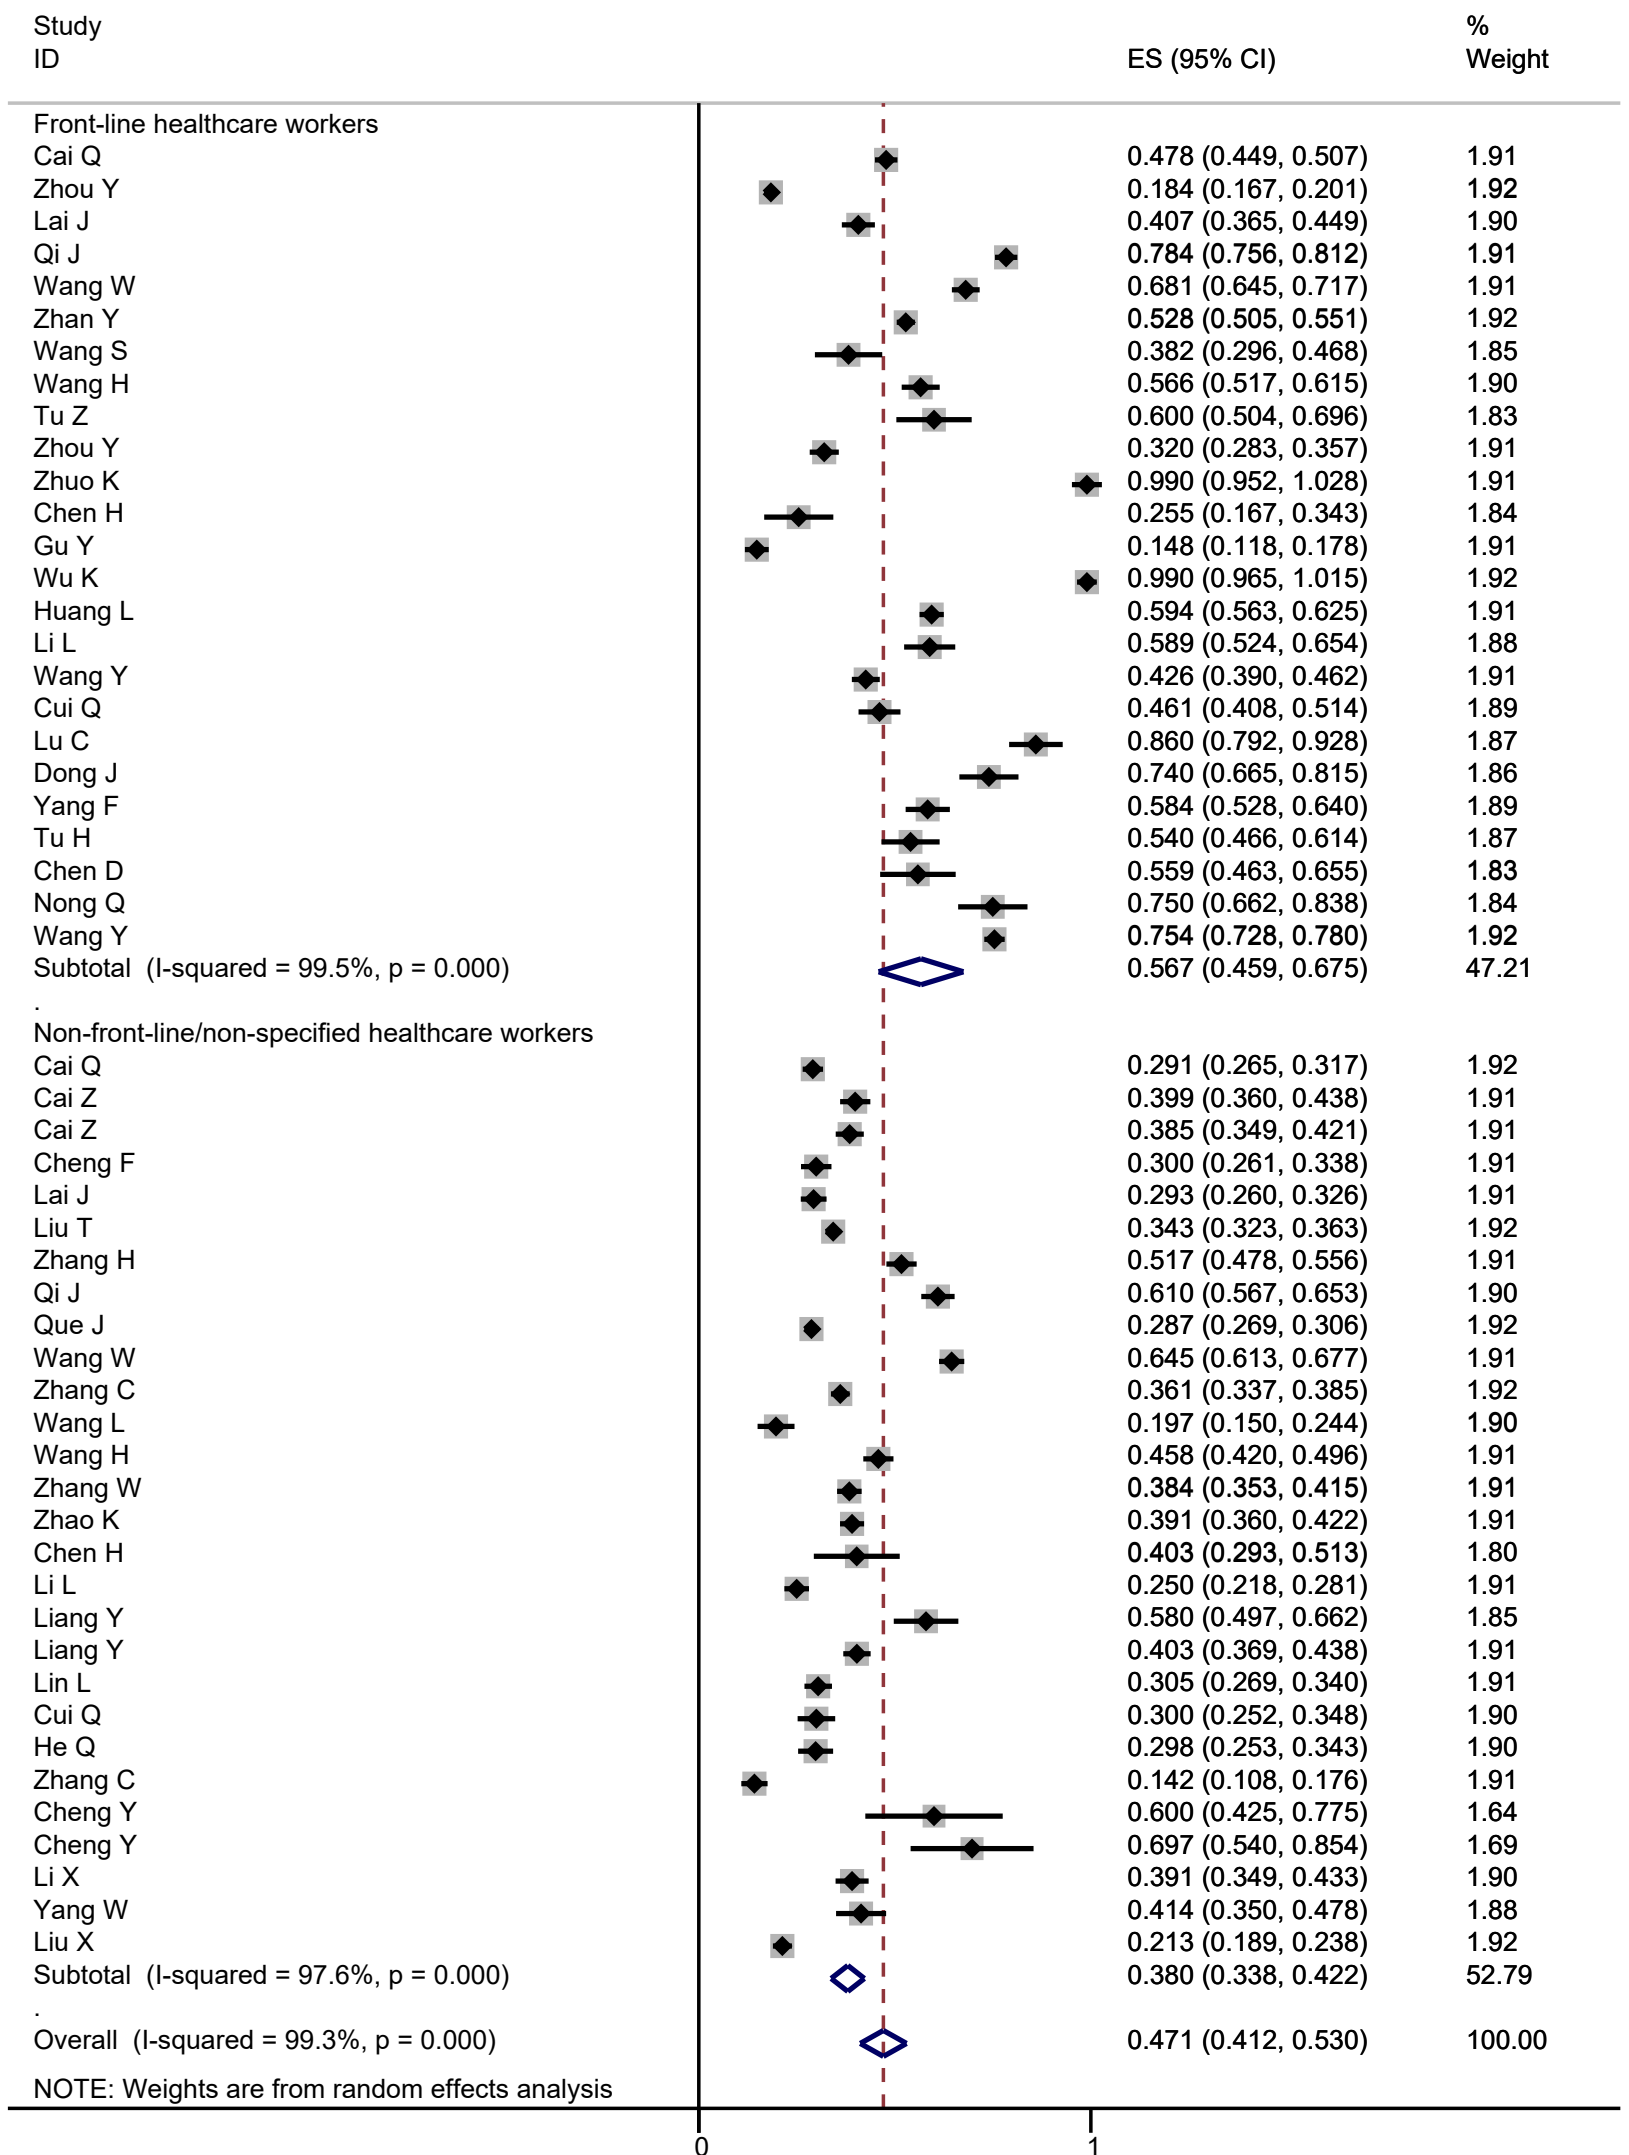

NOTE: Weights are from random effects analysis

Supplement: mmc11.pdf [file mmc11.pdf]

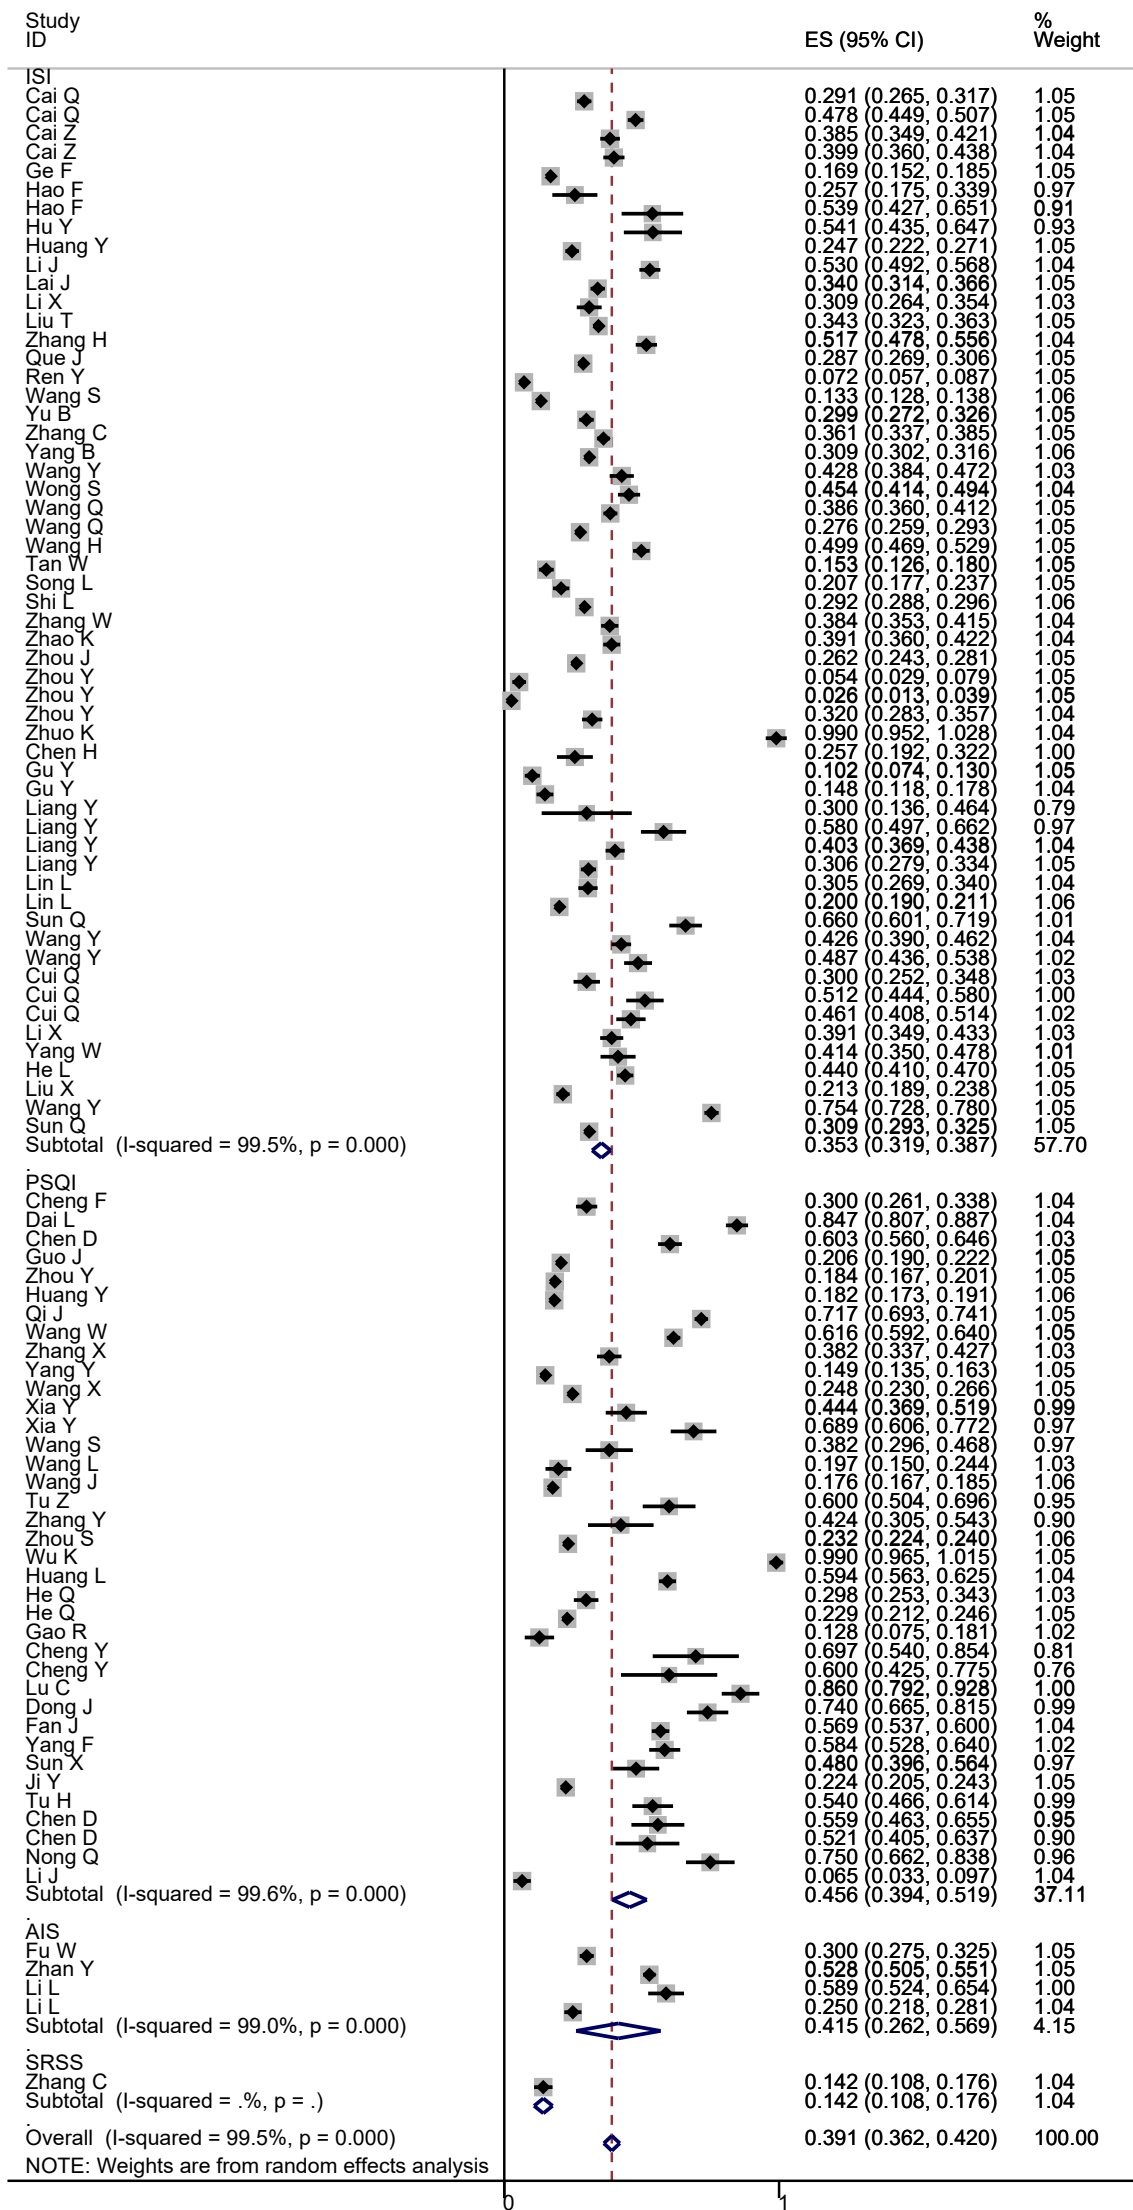

Supplement: mmc4.pdf [file mmc4.pdf]

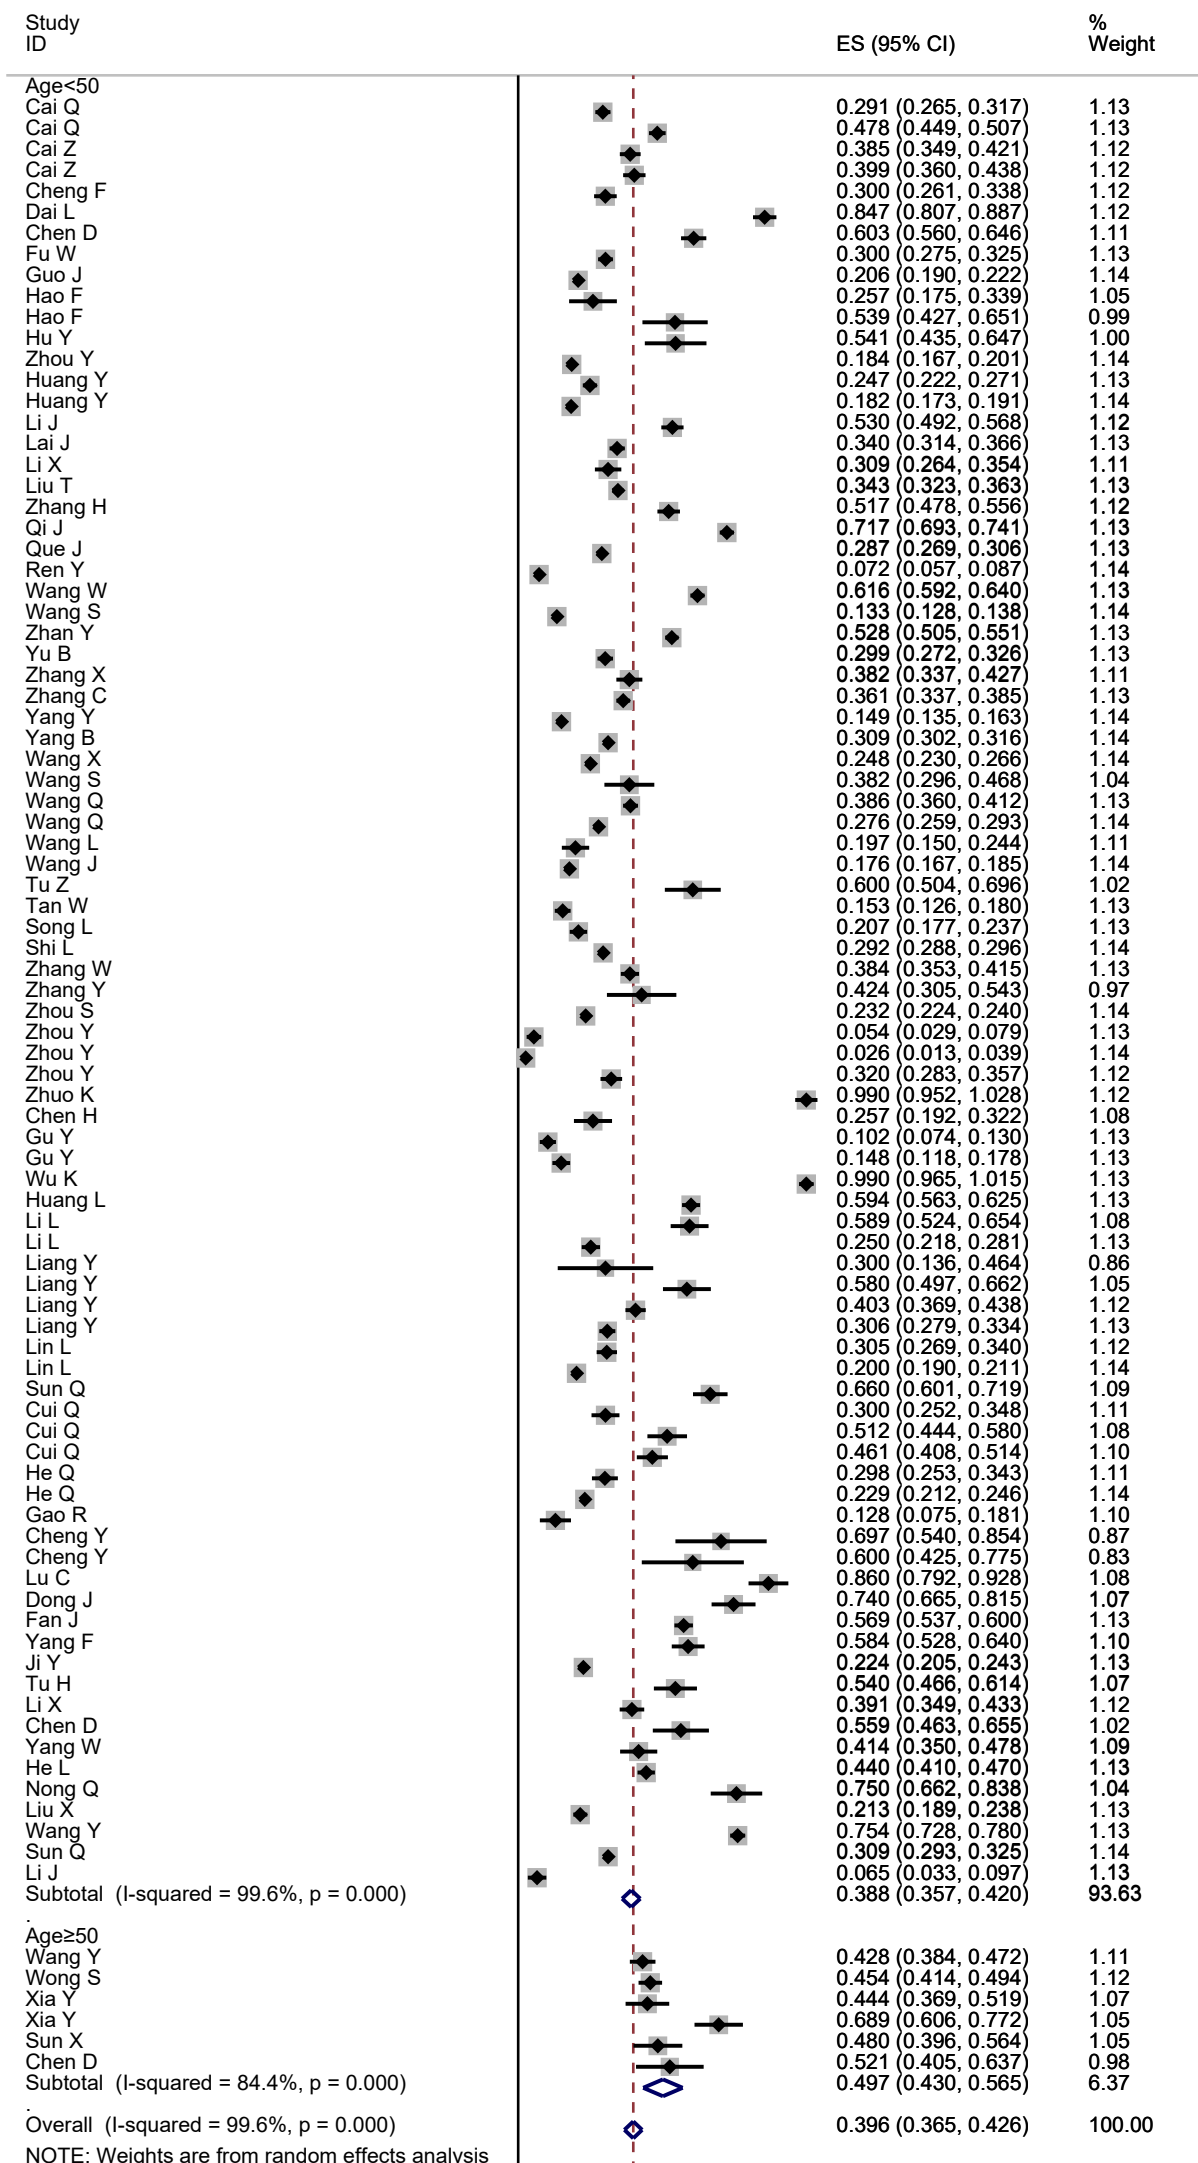

Supplement: mmc6.pdf [file mmc6.pdf]

Funnel plot with pseudo 95% confidence limits

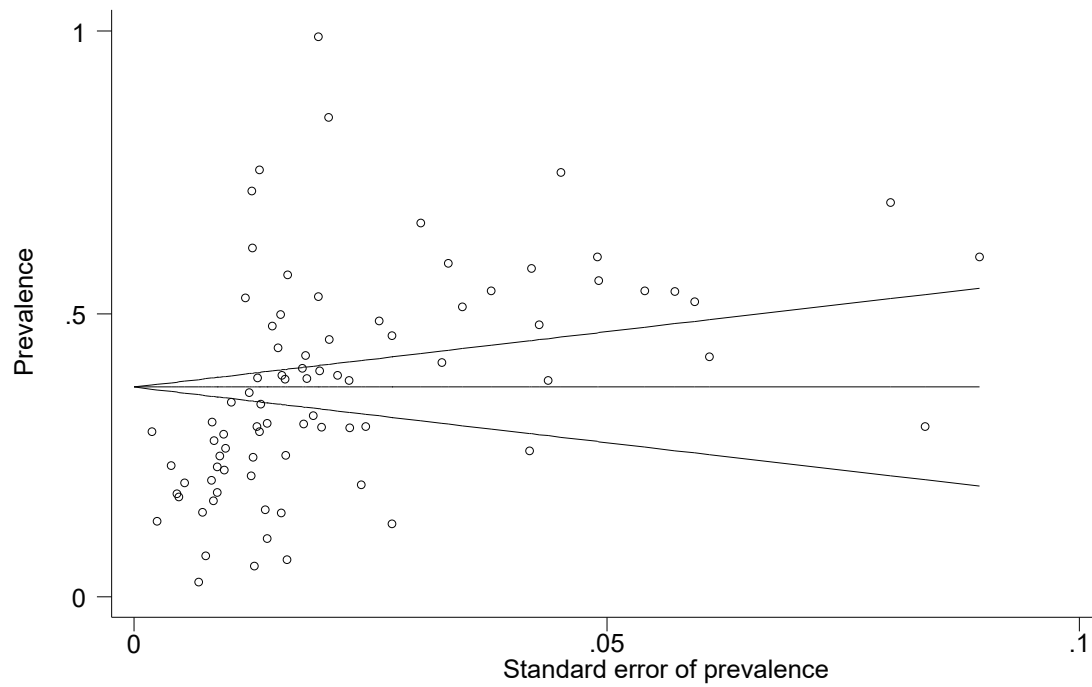

Supplement: mmc8.pdf [file mmc8.pdf]

Funnel plot with pseudo 95% confidence limits

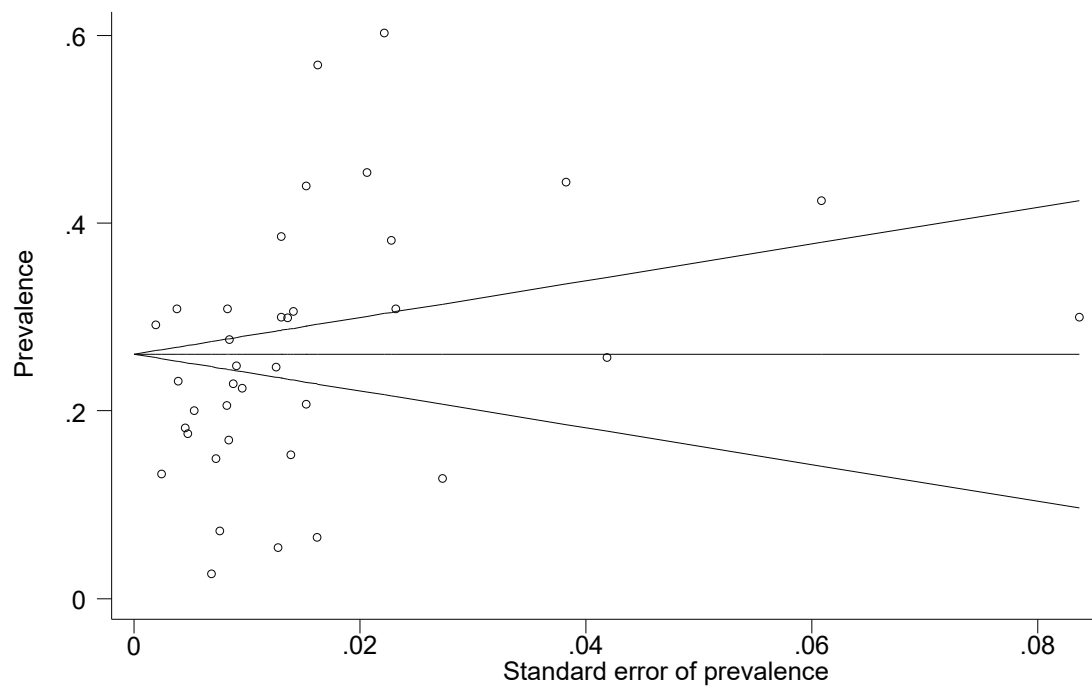

Supplement: mmc9.pdf [file mmc9.pdf]
